# Supplementary material for: Topology Optimization of Free Damping Treatments on Plates Using Level Set Method
Source: Hindawi journal article supplement (doi:10.1155/2020/5084167), 2020-01-23
Supplement: f1 [file 5084167.f1.zip]

Archive with 6 entries (5 files):
- 5084167.f1/matlabcodes/
- 5084167.f1/matlabcodes/Freedamping_optimization.m
- 5084167.f1/matlabcodes/ShellQuadElementMass.m
- 5084167.f1/matlabcodes/ShellQuadElementStiff.m
- 5084167.f1/matlabcodes/ShellQuadElementStiffBase.m
- 5084167.f1/matlabcodes/ShellQuadElementStiffVisco.m
